# Supplementary material for: A manganese catalyst for highly reactive yet chemoselective intramolecular C(sp3)–H amination
Source: Springer Nature journal article supplement (doi:10.1038/nchem.2366), 2015-10-05

| Parameter                 | Value               |
|---------------------------|---------------------|
| 1 Title                   |                     |
| 2 Origin                  | Varian              |
| 3 Spectrometer            | inova               |
| 4 Solvent                 | CDCl3               |
| 5 Temperature             | 20.0                |
| 6 Pulse Sequence          | s2pul               |
| 7 Experiment              | 1D                  |
| 8 Probe                   | QUAD                |
| 9 Number of Scans         | 200                 |
| 10 Receiver Gain          | 60                  |
| 11 Relaxation Delay       | 1.0000              |
| 12 Pulse Width            | 0.0000              |
| 13 Acquisition Time       | 1.0863              |
| 14 Acquisition Date       | 2014-03-13T15:22:31 |
| 15 Modification Date      | 2014-03-13T15:22:49 |
| 16 Spectrometer Frequency | 125.66              |
| 17 Spectral Width         | 30165.9             |
| 18 Lowest Frequency       | -1260.2             |
| 19 Nucleus                | 13C                 |
| 20 Acquired Size          | 32768               |
| 21 Spectral Size          | 65536               |

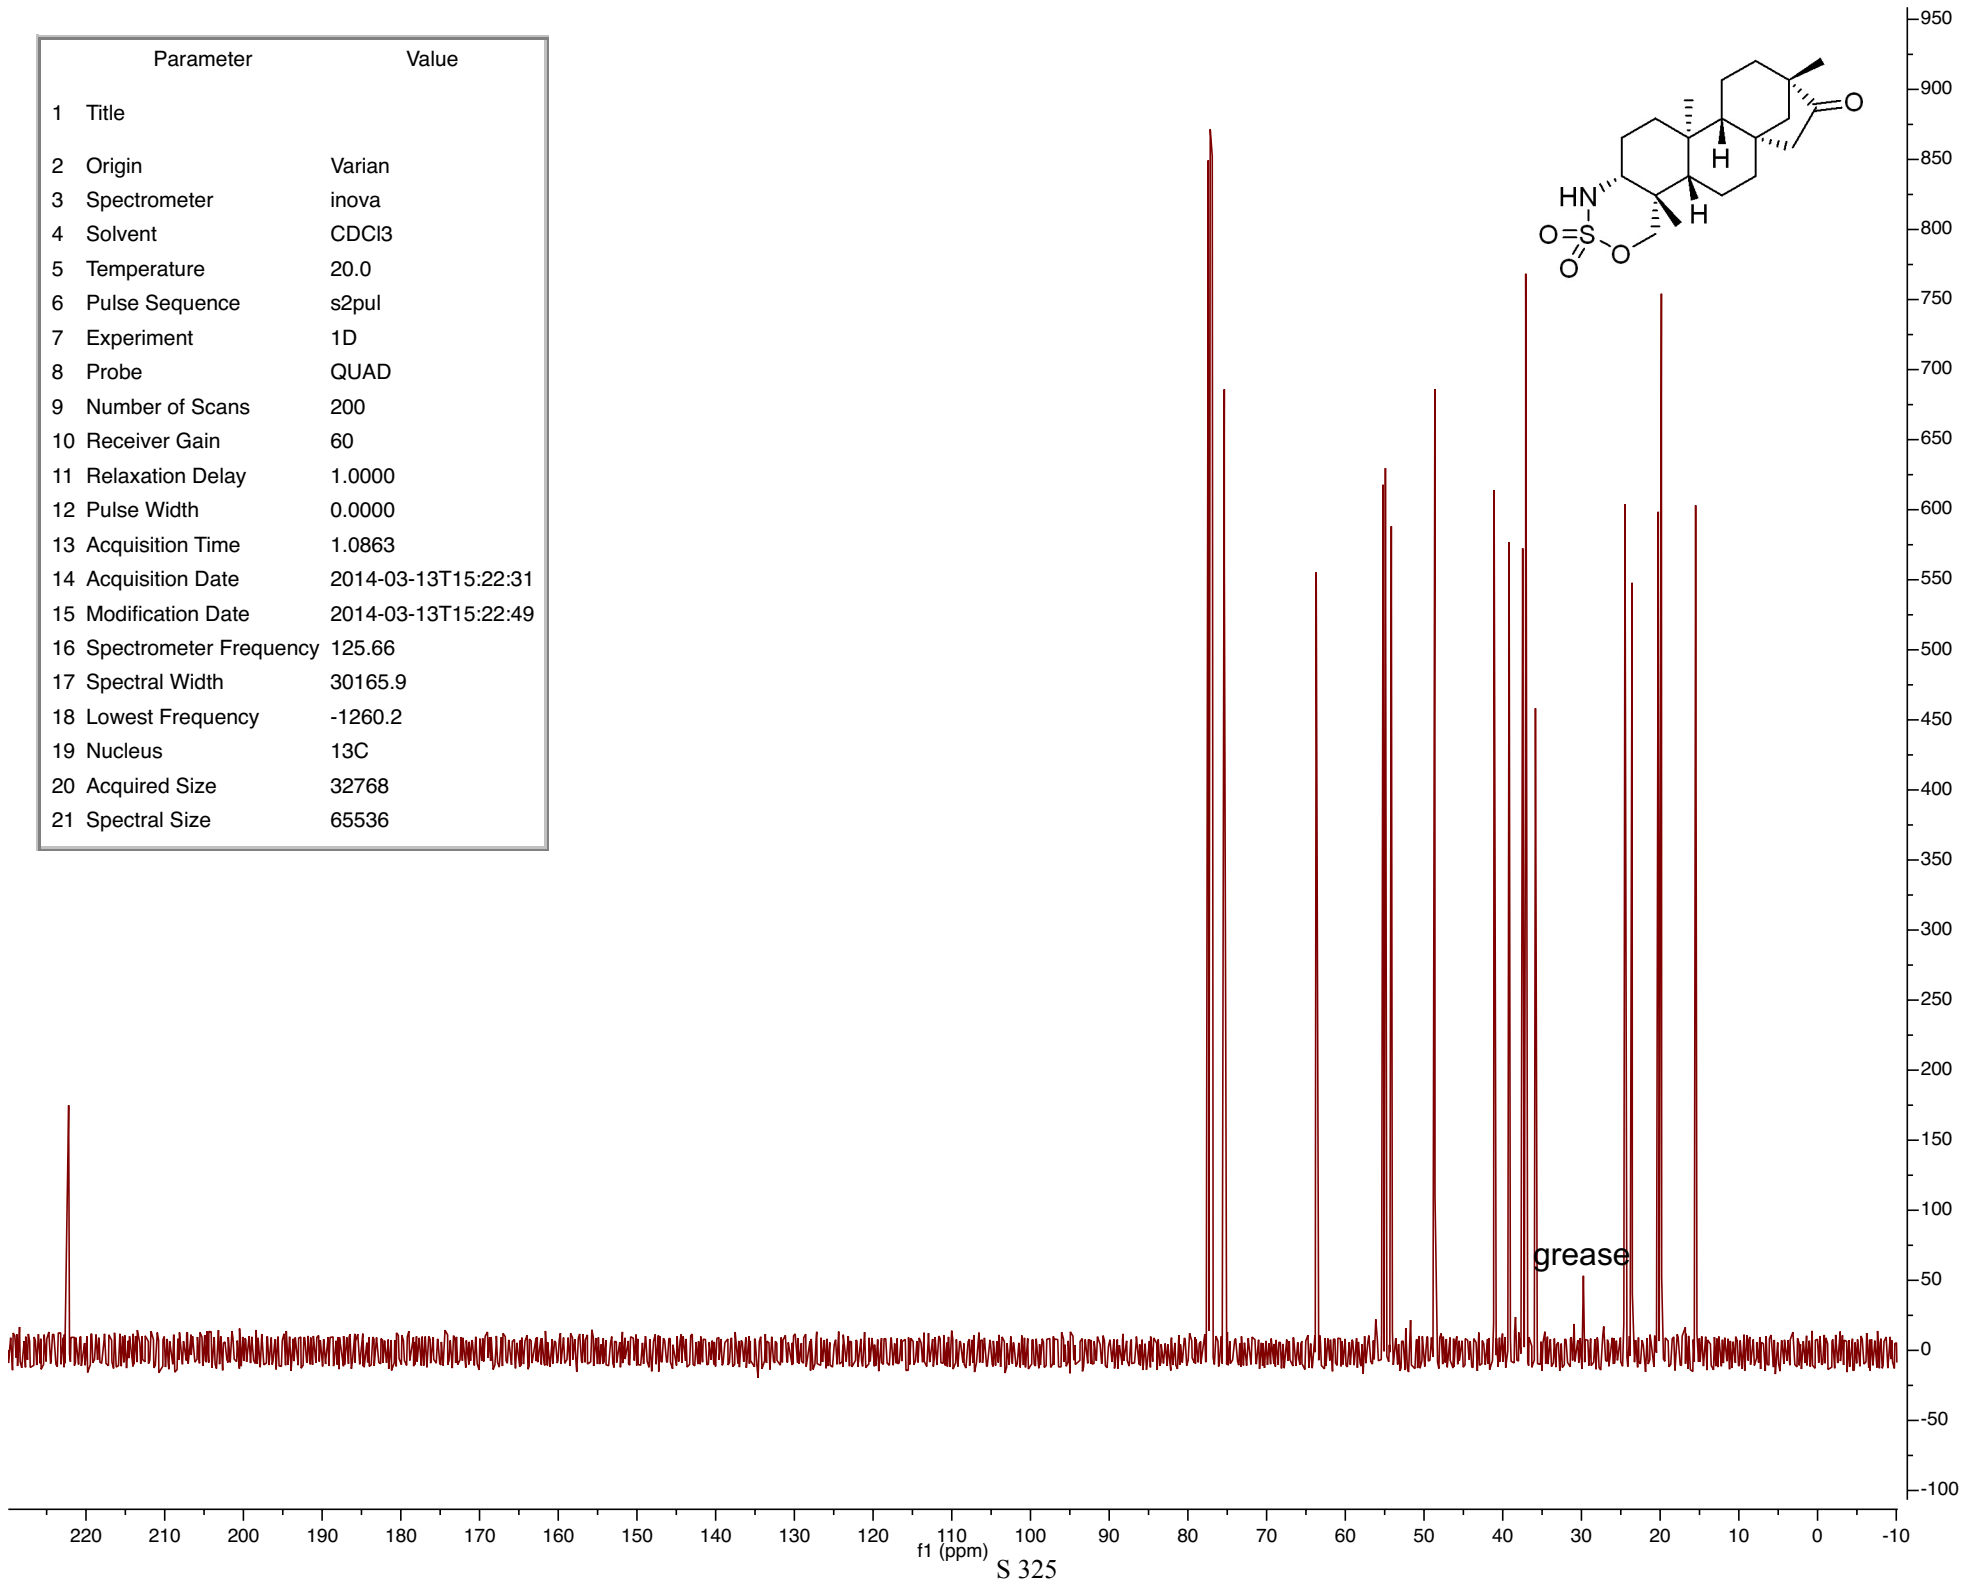

Supplement: 41557_2015_BFnchem2366_MOESM212_ESM.pdf [file 41557_2015_BFnchem2366_MOESM212_ESM.pdf]
