# Supplementary material for: A manganese catalyst for highly reactive yet chemoselective intramolecular C(sp3)–H amination
Source: Springer Nature journal article supplement (doi:10.1038/nchem.2366), 2015-10-05
Supplement: 41557_2015_BFnchem2366_MOESM214_ESM.mol [file 41557_2015_BFnchem2366_MOESM214_ESM.mol]

  ChemDraw09111504572D

 28 32  0  0  0  0  0  0  0  0999 V2000
   -1.7171    0.5635    0.0000 C   0  0  0  0  0  0  0  0  0  0  0  0
   -1.7171   -0.2615    0.0000 C   0  0  0  0  0  0  0  0  0  0  0  0
   -1.0026   -0.6740    0.0000 C   0  0  0  0  0  0  0  0  0  0  0  0
   -0.2882   -0.2615    0.0000 C   0  0  0  0  0  0  0  0  0  0  0  0
   -0.2882    0.5635    0.0000 C   0  0  0  0  0  0  0  0  0  0  0  0
   -1.0026    0.9760    0.0000 C   0  0  0  0  0  0  0  0  0  0  0  0
    0.4263   -0.6740    0.0000 C   0  0  0  0  0  0  0  0  0  0  0  0
    1.1408   -0.2615    0.0000 C   0  0  0  0  0  0  0  0  0  0  0  0
    1.1408    0.5635    0.0000 C   0  0  0  0  0  0  0  0  0  0  0  0
    0.4263    0.9760    0.0000 C   0  0  0  0  0  0  0  0  0  0  0  0
    1.8553    0.9760    0.0000 C   0  0  0  0  0  0  0  0  0  0  0  0
    1.8553    1.8010    0.0000 C   0  0  0  0  0  0  0  0  0  0  0  0
    1.1408    2.2135    0.0000 C   0  0  0  0  0  0  0  0  0  0  0  0
    0.4263    1.8010    0.0000 C   0  0  0  0  0  0  0  0  0  0  0  0
    1.9377    0.3500    0.0000 C   0  0  0  0  0  0  0  0  0  0  0  0
    2.4386    1.2176    0.0000 C   0  0  0  0  0  0  0  0  0  0  0  0
   -0.5042   -1.3025    0.0000 C   0  0  0  0  0  0  0  0  0  0  0  0
    2.5697    2.2135    0.0000 C   0  0  0  0  0  0  0  0  0  0  0  0
   -0.2882    1.3885    0.0000 C   0  0  0  0  0  0  0  0  0  0  0  0
    0.4263    0.1510    0.0000 H   0  0  0  0  0  0  0  0  0  0  0  0
   -0.0746   -1.0584    0.0000 H   0  0  0  0  0  0  0  0  0  0  0  0
    3.2566    1.3253    0.0000 O   0  0  0  0  0  0  0  0  0  0  0  0
   -2.4316   -0.6740    0.0000 N   0  0  0  0  0  0  0  0  0  0  0  0
   -2.4316   -1.4990    0.0000 S   0  0  0  0  0  0  0  0  0  0  0  0
   -1.7171   -1.9115    0.0000 O   0  0  0  0  0  0  0  0  0  0  0  0
   -1.0026   -1.4990    0.0000 C   0  0  0  0  0  0  0  0  0  0  0  0
   -3.2566   -1.4990    0.0000 O   0  0  0  0  0  0  0  0  0  0  0  0
   -2.8441   -2.2135    0.0000 O   0  0  0  0  0  0  0  0  0  0  0  0
  1  2  1  0      
  2  3  1  0      
  3  4  1  0      
  4  5  1  0      
  5  6  1  0      
  6  1  1  0      
  4  7  1  0      
  7  8  1  0      
  8  9  1  0      
  9 10  1  0      
 10  5  1  0      
  9 11  1  0      
 11 12  1  0      
 12 13  1  0      
 13 14  1  0      
 14 10  1  0      
  9 15  1  6      
 12 16  1  6      
  3 17  1  1      
 12 18  1  1      
  5 19  1  6      
 10 20  1  1      
  4 21  1  1      
 16 15  1  0      
 16 22  2  0      
  2 23  1  6      
 23 24  1  0      
 24 25  1  0      
 25 26  1  0      
  3 26  1  6      
 24 27  2  0      
 24 28  2  0      
M  END
